# Supplementary material for: Onkologische Pflege braucht gute Konzepte
Source: Springer Nature journal article supplement (doi:10.1007/s41906-021-1011-0), 2021-03-17
Supplement: MOESM1 [file 18978042]

## Literatur

### zum Beitrag „Onkologische Pflege braucht gute Konzepte“ von Susanne Kelber

*PflegeZeitschrift* (74) 4/2021, S. 24-27

Abt-Zegelin, A. (2002). Patienten und Familienedukation. Tagungsband "Das Originäre der Pflege entdecken". (D. V. e.V., Hrsg.)

Armes, J., Wagland, R., Finnegan-John, J., Richardson, A., Corner, J., & Griffiths, P. (May-Jun 2014). Development and testing of the patient-reported chemotherapy indicators of symptoms and experience: patient-reported outcome and process indicators sensitive to the quality of nursing care in ambulatory chemotherapy settings. *Cancer Nursing*, 37(3):E52-60.  
doi:10.1097/NCC.0b013e3182980420

Baumann, W., & Welslau, M. (2017). Patientenadhärenz in der oralen medizinischen Onkologie. *Der Onkologe*, 23:645-650. doi:10.1007/s00761-017-0237-3

Bundesministerium für Gesundheit. (Dezember 2017). Nationaler Krebsplan. Nationaler Krenspan - Handlungsfelder, Ziele, Umsetzungsempfehlungen und Ergebnisse, 51-57. (R. 3. Bundesministerium für Gesundheit, Hrsg.)

Coolbrandt, A., Milisen, K., Wildiers, H., Aertgeerts, B., van Achterberg, T., Van der Elsta, E., & Dierckx de Casterlé, B. (Juni 2018). A nursing intervention aimed at reducing symptom burden during chemotherapy (CHEMO-SUPPORT): A mixed-methods study of the patient experience. *European Journal of Oncology Nursing*(34), 35-41. doi:10.1016/j.ejon.2018.03.002

Coolbrandt, A., Wildiers, H., Aertgeerts, B., Van der Elsta, E., Laenen, A., Dierckx de Casterlé, B., . . . Milisen, K. (March 2014). Characteristics and effectiveness of complex nursing interventions aimed at reducing symptom burden in adult patients treated with chemotherapy: A systematic review of randomized controlled trials. *International Journal of Nursing Studies*, Issue 3(Volume 51), 495-510. doi:10.1016/j.ijnurstu.2013.08.008

Deutsche Krebsgesellschaft. (06. 08 2019). Deutsche Krebsgesellschaft. (D. Krebsgesellschaft, Hrsg.) Abgerufen am 31. 05 2020 von [www.krebsgesellschaft.de](http://www.krebsgesellschaft.de):  
<https://www.krebsgesellschaft.de/jahresberichte.html>

Dokken, H., Stukenkemper, J., Huber, B., & Thoke-Colberg, A. (05 2005). Wissens- und Beratungsbedarf von Tumorpatienten zu Nebenwirkungen der Chemotherapie. (J. f. Pflegepraxis, Hrsg.) Abgerufen am 03. 08 2019 von *Pflegewissenschaft*: <https://www.pflegewissenschaft.info/online-ausgabe/archiv/archiv/2005/mai/863-MBDSVRKUWJTNCYZFGEHLP>

Evers, J. (01. 06 2015). Bedürfnisse onkologischer Patienten und ihrer Angehörigen im Rahmen einer ambulanten Chemotherapie - Ein möglicher Beratungsansatz im Kontext pflegerischen Handelns. Hochschule für Angewandte Wissenschaften Hamburg. Abgerufen am 03. 08 2019 von [http://edoc.sub.uni-hamburg.de/haw/volltexte/2016/3283/pdf/Evers\\_Jacqueline\\_BA\\_2016\\_04\\_26.pdf](http://edoc.sub.uni-hamburg.de/haw/volltexte/2016/3283/pdf/Evers_Jacqueline_BA_2016_04_26.pdf)

Hacker, M., Slobodenka, S., & Titzer, H. (2012). *Edukation in der Pflege*. Wien: Facultas.

- Hummel-Gaatz, S., & Doll, A. (2007). Unterstützung, Beratung und Anleitung in gesundheits- und pflegerelevanten Fragen fachkundig gewährleisten. München: Elsevier, Urban & Fischer.
- Ischebeck, K. (2017). Erfolgreiche Konzepte. Offenbach: GABAL Verlag GmbH.
- Kanfer, F., Reinecker, H., & Schmelzer, D. (2012). Selbstmanagement-Therapie. Heidelberg: Springer.
- Kelber, S. (06 2019). Was gehört zu einem onkologischem Pflegekonzept - Teil 1. Onkologische Pflege(02/2019), S. 40-43. doi:DOI 10.4486/j.op.2019.02.06
- Kelber, S. (09 2019). Was gehört zu einem onkologischen Pflegekonzept - Teil 2. Onkologische Pflege(03/2019), S. 48-54.
- Kelber, S. (2020). Onkologische Zertifizierungen, Pflegekonzepte und Pflegeberatung. Onkologe 26, 1019–1032 (2020). <https://doi.org/10.1007/s00761-020-00830-6>
- Landespflegeausschuss Brandenburg. (kein Datum). Ministerium für Arbeit, Soziales, Gesundheit, Frauen und Familie. Abgerufen am 01. 04 2019 von [masgf.brandenburg.de](http://masgf.brandenburg.de):  
[https://masgf.brandenburg.de/media\\_fast/4055/Beschluss\\_Einrichtungskonzept\\_Anlage\\_1b.pdf](https://masgf.brandenburg.de/media_fast/4055/Beschluss_Einrichtungskonzept_Anlage_1b.pdf)
- Maltby, J., Day, L., & Macaskill, A. (2011). Differentielle Psychologie, Persönlichkeit und Intelligenz. Hallbergmoos: Pearson Studium.
- Mattern, K., Feyerherd, A., & Luntz, J. (Dezember 2017). Pflegefachberatung in der Onkologie. Onkologische Pflege(4), S. 45-48.
- Michell-Auli, P., & Gerlich, R. (17. Mai 2018). Entstehung von Beratungsqualität in der Pflege. Entwicklung und Testung eines Kausalmodells für die Pflegeberatung nach § 7a SGB XI. Zeitschrift für Gerontologie und Geriatrie. doi:10.1007/s00391-018-1403-y
- OnkoZert. (03. 12 2019). OnkoZert. Abgerufen am 31. 05 2020 von <https://www.onkozert.de/onkologische-zentren/>
- PCS Akademie. (18. 09 2018). PCS Akademie. Abgerufen am 29. 06 2019 von PCS Campus: <https://www.pcs-campus.de/texten/verstaendlichkeitkonzept/>
- Pfeifer-Rabe, M., Hojdelewicz, B. M., & Durchschlag, D. (2019). Onkologische Gesundheits- und Krankenpflege. Wien: Facultas.
- Raschper, P. (2015). Kommunikation zwischen Pflegenden und onkologischen Patienten - Eine empirische Kompetenzerfassung als Beitrag zur Qualifikationsforschung im Berufsfeld Pflege. Lage: Jacobs-Verlag.
- Reibnitz, C. v., Sonntag, K., & Strackbein, D. (2017). Patientenorientierte Beratung in der Pflege. Berlin Heidelberg: Springer.
- Spee, A. v. (März 2014). Beratung in der Pflege. Onkologische Pflege 1/2014, S. 15-20.
- Spichiger et al., E. (2006). Professionelle Pflege – Entwicklung und Inhalte einer Definition. Pflege(19), S. 45-51. doi:<https://doi.org/10.1024/1012-5302.19.1.45>
- van Weert, J., Bolle, S., van Dulmen, S., & Jansen, J. (Sep; 2013). Older cancer patients' information and communication needs: what they want is what they get? Patient education an counseling, S. 92(3):388-97. doi:10.1016/j.pec.2013.03.011
- van Weert, J., Jansen, J., de Bruijn, G., Noordman, J., van Dulmen, S., & Bensing, J. (Nov 2009). QUOTEchemo: a patient-centred instrument to measure quality of communication preceding

chemotherapy treatment through the patient's eyes. European Journal of Cancer, S. 45(17):2967-76.  
doi:10.1016/j.ejca.2009.06.001

Zegelin, A. (2012). Mikroschulungen - ein pflegegeeignetes, praxisnahes Format. PADUA 7, 55-59 .
