# Supplementary material for: Onkologische Pflege braucht gute Konzepte
Source: Springer Nature journal article supplement (doi:10.1007/s41906-021-1011-0), 2021-03-17
Supplement: MOESM2 [file 18978042]

## Abbildung 1

zum Beitrag „Onkologische Pflege braucht gute Konzepte“  
von Susanne Kelber

PflegeZeitschrift (74) 4/2021, S. 24-27

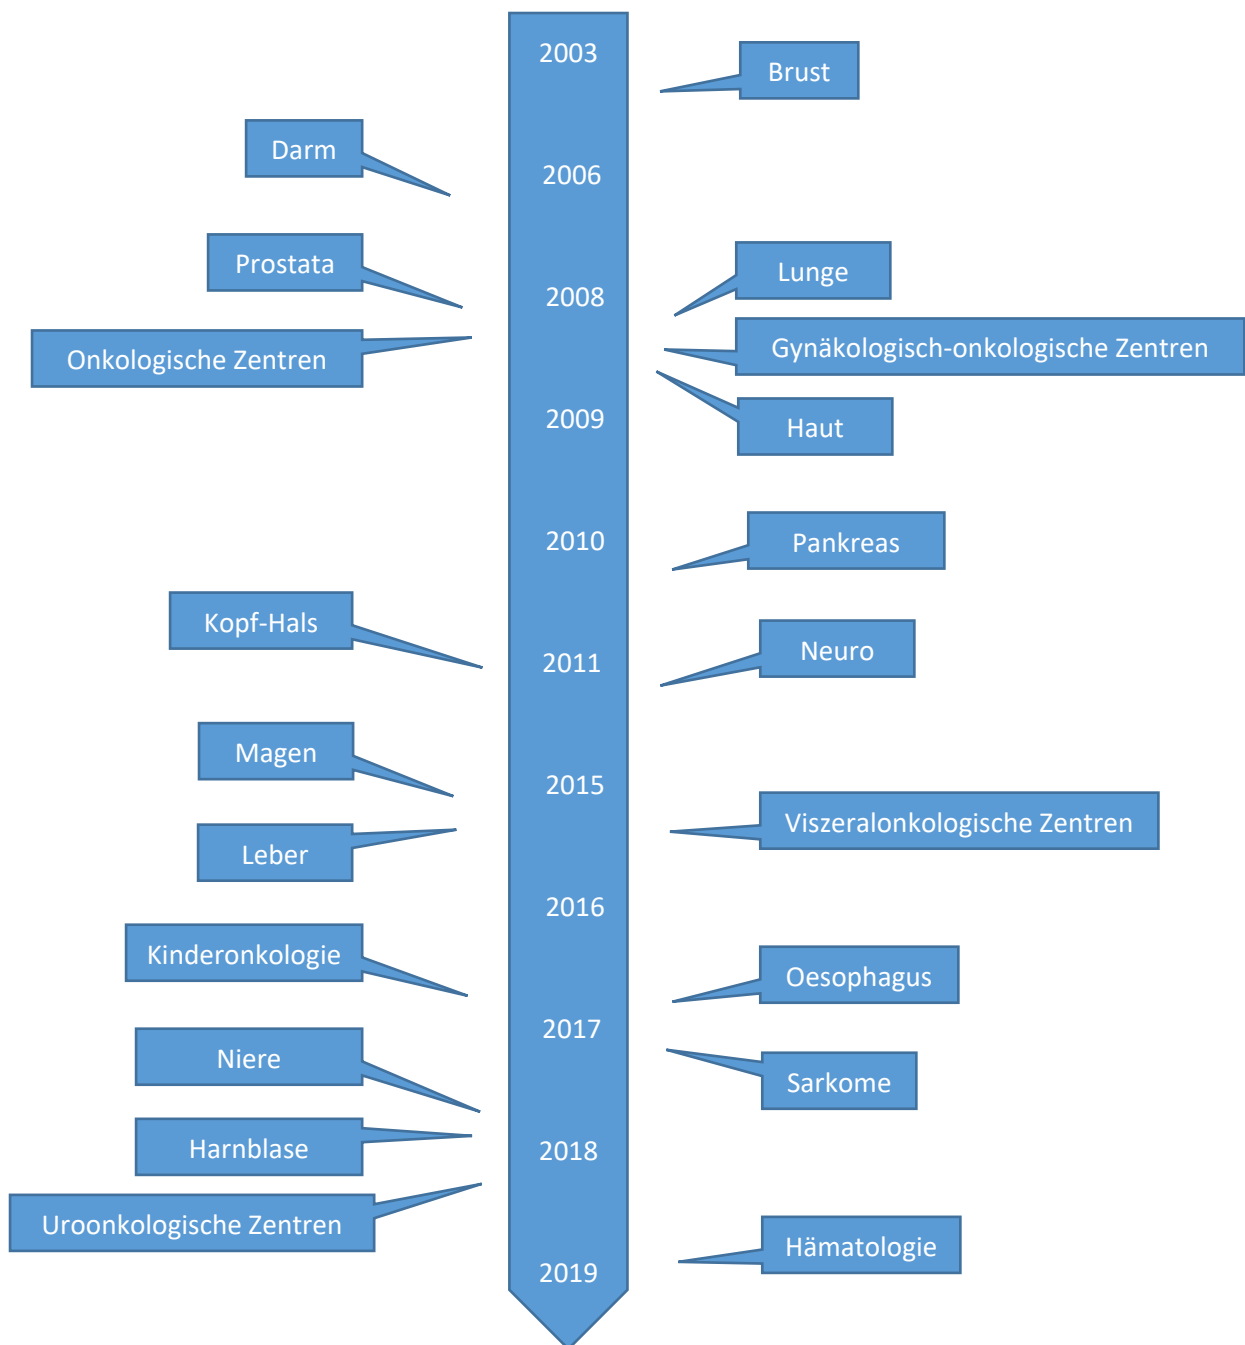

Abb.1: Eigene Darstellung nach dem Jahresbericht 2019 der zertifizierten Onkologischen Zentren  
(Deutsche Krebsgesellschaft, 2019)
