# Supplementary material for: Onkologische Pflege braucht gute Konzepte
Source: Springer Nature journal article supplement (doi:10.1007/s41906-021-1011-0), 2021-03-17
Supplement: MOESM3 [file 18978042]

## Tabelle 1

### zum Beitrag „Onkologische Pflege braucht gute Konzepte“ von Susanne Kelber

PflegeZeitschrift (74) 4/2021, S. 24-27

Tab.1: Mögliche Inhalte eines onkologischen Pflegekonzeptes

| <b>Mögliche Gliederungspunkte</b> | <b>Inhaltsbeispiele</b>                                                                                                                                                                 |
|-----------------------------------|-----------------------------------------------------------------------------------------------------------------------------------------------------------------------------------------|
| Einleitung                        | Zweck, Kernbotschaft, Nutzenargumentation, Vorstellung der Einrichtung, ggf. Inhaltsverzeichnis                                                                                         |
| Pflegeverständnis                 | Leitbilder (wenn nicht bereits vorhanden), onkologisches Pflegeverständnis, pflegetheoretische Grundlagen, z.B. WHO-Pflegeprozessmodell, D. Orem usw.                                   |
| Zielsetzung                       | Ziele der onkologischen Pflege, Zielgruppen                                                                                                                                             |
| Organisation                      | Pflegeorganisation, Bereichszuordnungen, Pflegesystem, Zuständigkeiten, Erreichbarkeit                                                                                                  |
| Prozesse                          | Pflegeprozess, Prozesse der Patientenedukation: Pflegeberatungsprozess (Hummel-Gaatz & Doll, 2007), (Mikro-) Schulungsprozess (Zegelin, 2012)                                           |
| Leistungen und Zusatzleistungen   | Tätigkeitsfelder, Tätigkeitsbeschreibung, Onkologische Pflegeberatung, Palliativdienste, Onkologische Pflegevisite und Fallbesprechungen, kollegiale Beratung, Schulungen/Fortbildungen |
| Multidisziplinäre Zusammenarbeit  | Zusammenarbeit mit anderen Berufsgruppen, Besprechungen, Tumorboard, Schnittstellen, Kooperationspartner                                                                                |
| Qualitätssicherung                | Verständnis und Bedeutung Pflegequalität, Einarbeitung, Qualitätszirkel, Arbeitsgruppen, Erstellung SOP's, Richtlinien usw.                                                             |
| Weiterentwicklung                 | Umsetzung evidenzbasiertes Arbeiten (Abb.2), Fort- und Weiterbildung (Konzepte und Pläne), Verständnis lebenslanges Lernen,                                                             |
| Sonstiges                         | Kommunikationsstrukturen, räumliche, sachliche, personelle Ausstattung, Einbindung Organkrebskonzepte, mitgeltende Dokumente, Flyer usw.                                                |
